# Supplementary material for: Antibiotic translocation through porins studied in planar lipid bilayers using parallel platforms
Source: Royal Society of Chemistry journal article supplement (doi:10.1039/c4an02335h), 2015-01-01
Supplement: c4an02335h1.pdf [file c4an02335h1.pdf]

## Antibiotic translocation through porins studied in planar lipid bilayers using parallel platforms

Conrad Weichbrodt<sup>1</sup>, Harsha Bajaj<sup>2</sup>, Gerhard Baaken<sup>3</sup>, Jiajun Wang<sup>1,2</sup>, Serap Guinot<sup>1</sup>, Mohamed Kreir<sup>1</sup>, Jan C. Behrends<sup>3,4</sup>, Mathias Winterhalter<sup>2</sup>, Niels Fertig<sup>1</sup>

<sup>1</sup> Nanion Technologies GmbH, Gabrielenstr. 9, 80 636 München, Germany

<sup>2</sup> Jacobs University Bremen, Campusring 1, 28 759 Bremen, Germany

<sup>3</sup> Ionera Technologies GmbH, Hermann-Herder-Str.7, 79104 Freiburg, Germany

<sup>4</sup> Laboratory for Membrane Physiology and –Technology, Department of Physiology, University of Freiburg, Hermann-Herder-Str.7, 79104 Freiburg, Germany

### Supporting Information

**Supplementary Table 1:** Kinetic properties found for the interaction of a single OmpF protein and three different antibiotics. (Analysis performed with dead time/ignore duration as 50  $\mu$ s: conditions: 1M KCl, 20mM MES pH 6, at  $\pm$ 50 mV)

| Antibiotic                                | Method       | $k_{\text{on}}$ [ $\text{M}^{-1} \text{s}^{-1}$ ] | $k_{\text{off}}$ [ $\text{s}^{-1}$ ] |
|-------------------------------------------|--------------|---------------------------------------------------|--------------------------------------|
| Cefepime<br>( <i>trans</i> side addition) | BLM          | 3.200 $\pm$ 200                                   | 11.100                               |
|                                           | Orbit 16     | 2.000 $\pm$ 700                                   | 16.100                               |
|                                           | Port-a-Patch | 3.800 $\pm$ 700                                   | 9.100                                |
| Ceftazidime<br>( <i>cis</i> addition)     | BLM          | 600 $\pm$ 100                                     | 12.000                               |
|                                           | Orbit 16     | 900 $\pm$ 300                                     | 16.400                               |
|                                           | Port-a-Patch | 700 $\pm$ 400                                     | 11.400                               |
| Imipenem<br>( <i>cis</i> side addition)   | BLM          | 1.100 $\pm$ 100                                   | 14.000                               |
|                                           | Orbit 16     | 1.600 $\pm$ 200                                   | 19.000                               |
|                                           | Port-a-Patch | 2.800 $\pm$ 600                                   | 14.000                               |

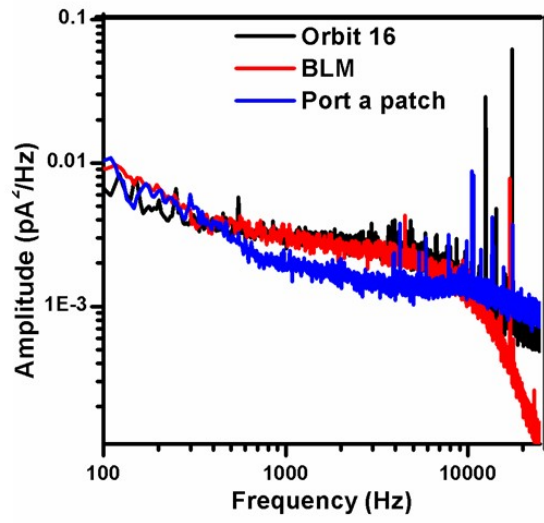

**Supplementary Figure 1:** Power spectrum from both systems compared to BLM.
